# Supplementary material
Source: HighWire-hosted journal article supplement (https://www.cmaj.ca/highwire/filestream/72873/field_highwire_adjunct_files/0/181542-image-1-at.pdf)
Supplement: 181542-image-1-at.pdf [file 181542-image-1-at.pdf]

**Appendix 1 (as submitted by the author): Supplementary Figure 1**

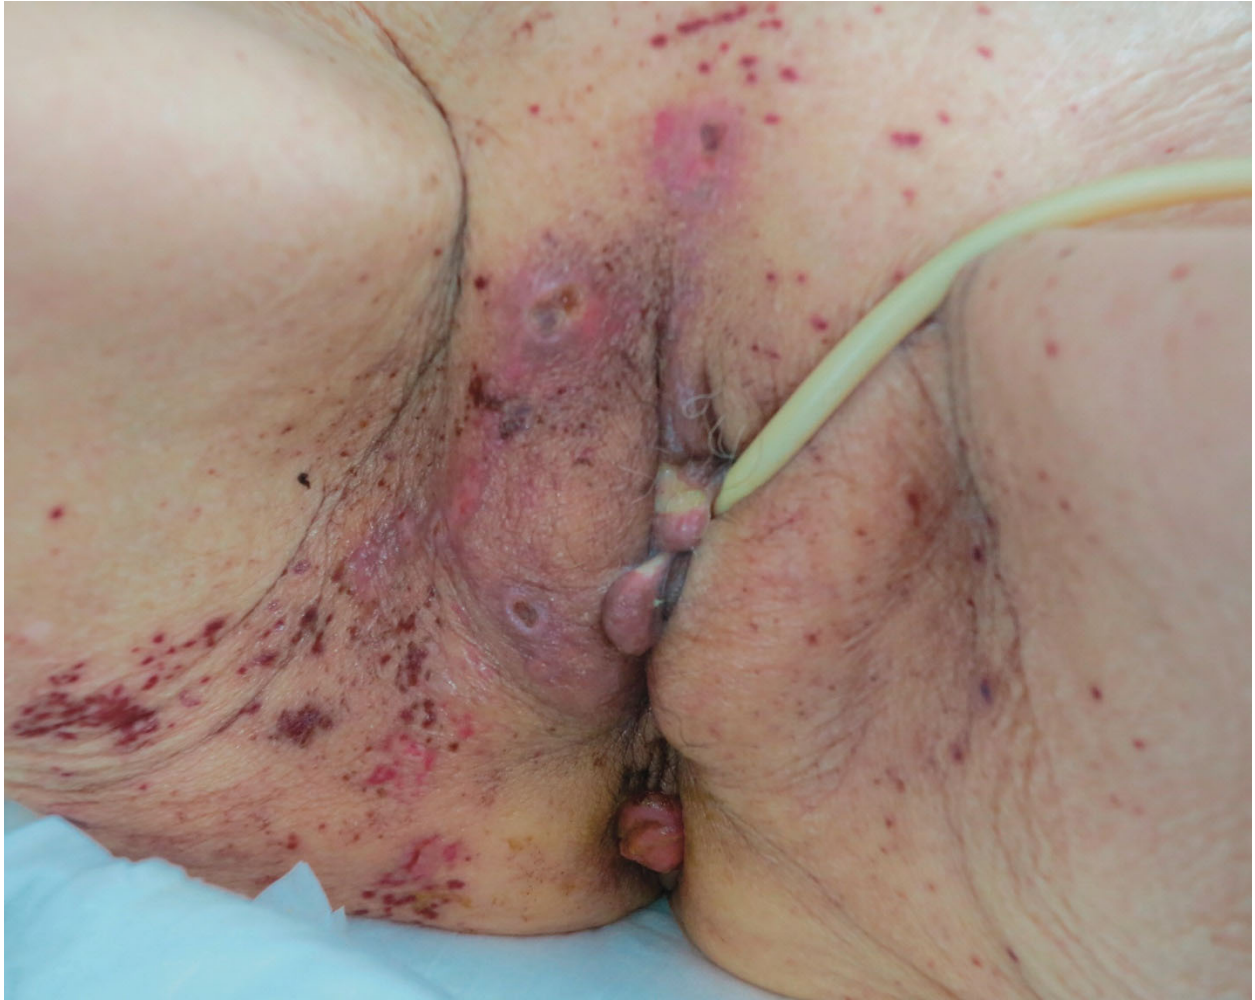

**Supplementary Figure.** Erythemas with scabs in the right buttock and the right external genitalia.
